# Supplementary material for: Can Dietary Patterns Impact Fertility Outcomes? A Systematic Review and Meta-Analysis
Source: MDPI journal article supplement (doi:10.3390/nu15112589), 2023-05-31
Supplement: s1 [file s1]

Registered in Open Sciences Framework (10.17605/OSF.IO/FBV6W)

#### Search strategy

Search date: 27 September 2021

Data bases:

- Ovid Medline
- EMBASE
- CAB Direct
- CINAHL Plus

#### Search strategy

1. preconcep\$.tw.
2. pre-concep\$.tw.
3. prepregnan\$.tw.
4. pre-pregnan\$.tw.
5. pregestation\$.tw.
6. pre-gestation\$.tw.
7. periconception\$.tw.
8. peri-conception\$.tw.
9. peri conceiton\$.tw.
10. interpregnan\$.tw.
11. inter-pregnan\$.tw.
12. intergestaion\$.tw.
13. inter-gestation\$.tw.
14. interconcp\$.tw.
15. inter-concep\$.tw.
16. internatal.tw.
17. inter-natal.tw.
18. before pregnan\$.tw.
19. pregnancy intention.tw.
20. pregnancy plan\$.tw.
21. reproductive age\*.tw.
22. exp Preconceiton Care/
23. exp family planning service/
24. exp perinatal care/
25. exp Infertility, Female/
26. subfertil\$.tw.
27. infertil\$.tw.
28. fertility.tw
29. fecund\$.tw.
30. in vitro fertili\*ation.tw.
31. intrauterine insemination.tw.
32. artificial insemination.tw.
33. ivf.tw.
34. icsi.tw.
35. iui.tw.
36. ART.tw.
37. Embryo transfer.tw.
38. Assisted reproduc\$.tw.

39. Assisted conce\$.tw.
40. Artificial reproduc\$.tw.
41. or/1-40\$.tw.
42. diet\$.tw
43. nutrition\$.tw.
44. nutrient\$.tw.
45. food\$.tw.
46. eat\$.tw.
47. lifestyle.tw.
48. life style.tw.
49. intake.tw.
50. consum\$.tw.
51. meat.tw.
52. poultry.tw.
53. chicken.tw.
54. fish.tw.
55. seafood.tw.
56. soy.tw.
57. legume\$.tw.
58. bean\$.tw.
59. nut\$.tw.
60. seed\$.tw.
61. dairy.tw.
62. fruit.tw.
63. vegetable.tw.
64. cereal.tw.
65. grain\$.tw.
66. core food.tw.
67. non-core food.tw.
68. discretionary food.tw.
69. non-discretionary food.tw.
70. sugar sweetened.tw.
71. soft drink\$.tw.
72. juice.tw.
73. processed food\$.tw.
74. feeding behavior/
75. exp food/
76. exp diet/
77. exp diet therapy/
78. exp Life style
79. or/42-78
80. 41 and 79
81. limit 79 to humans
