# Supplementary material for: Can Dietary Patterns Impact Fertility Outcomes? A Systematic Review and Meta-Analysis
Source: MDPI journal article supplement (doi:10.3390/nu15112589), 2023-05-31
Supplement: s1 [file s1]

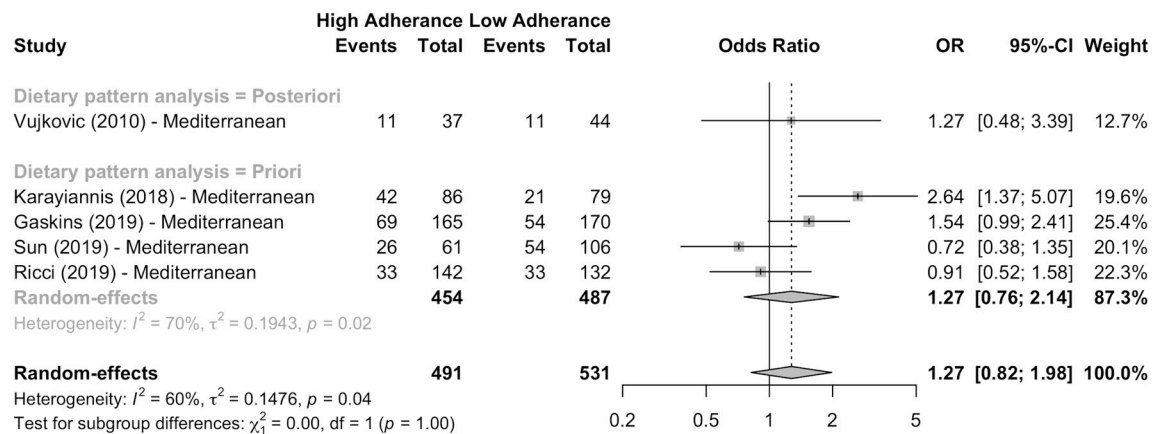

**Figure S1:** Crude OR of the association of Mediterranean diet to ART outcomes by subgroup: dietary pattern analysis (*a priori*, *posteriori*)

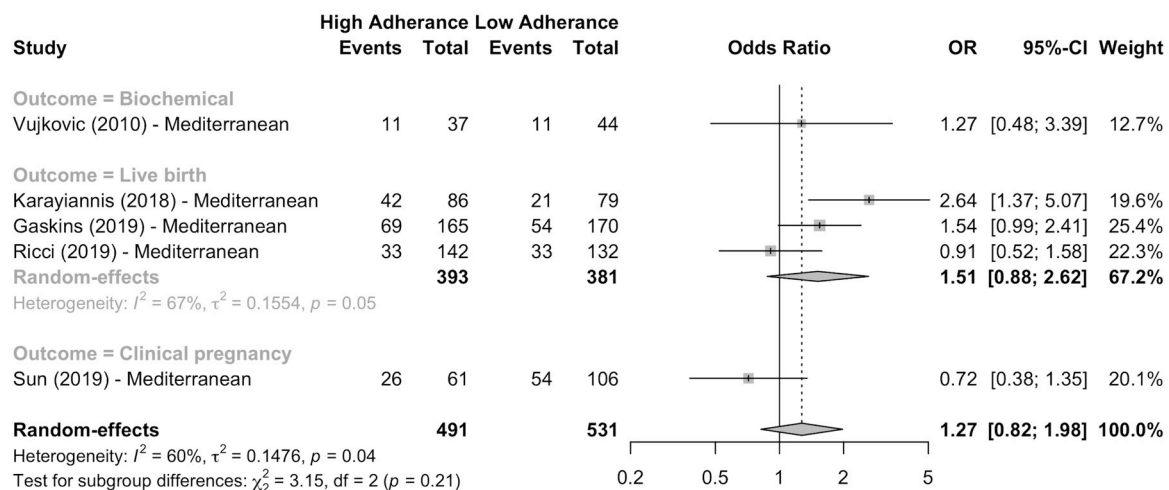

**Figure S2:** Crude OR of the association of Mediterranean diet to ART outcomes by subgroup: ART outcome (biochemical pregnancy, clinical pregnancy, live birth)

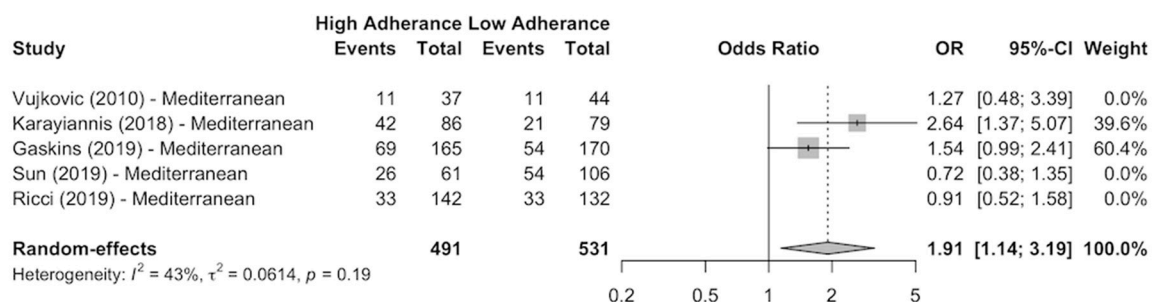

**Figure S3:** Crude OR of the association of Mediterranean diet to ART outcomes, sensitivity analysis: excluding high risk-of-bias studies

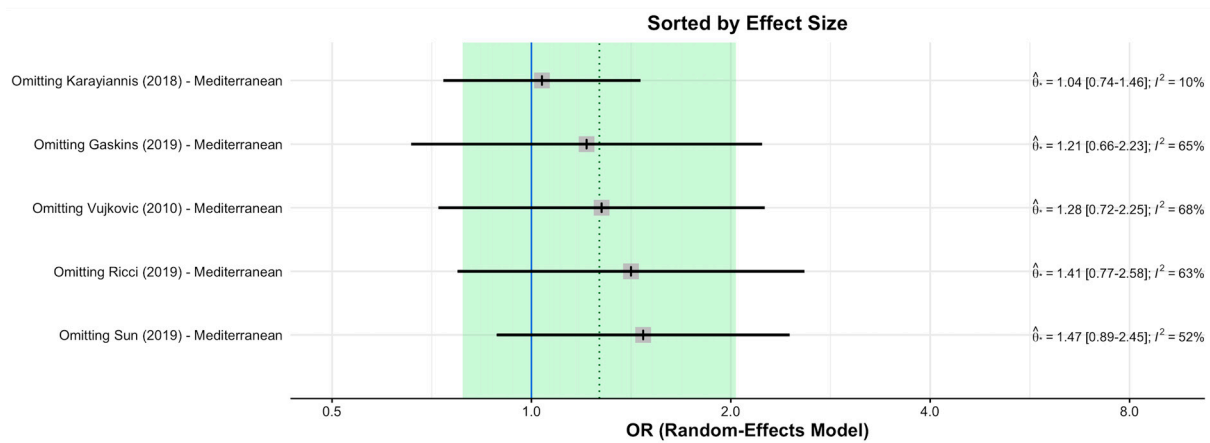

**Figure S4:** Crude OR of the association of Mediterranean diet to ART outcomes: Leave-one-out analysis

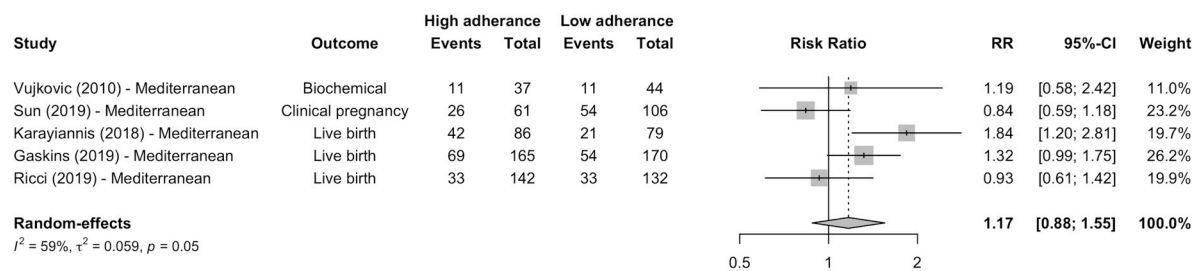

RR, relative risk. ART. CI, confidence interval.  $\tau^2$ , tau-squared

**Figure S5:** Crude RR of the association of Mediterranean diet to ART outcomes

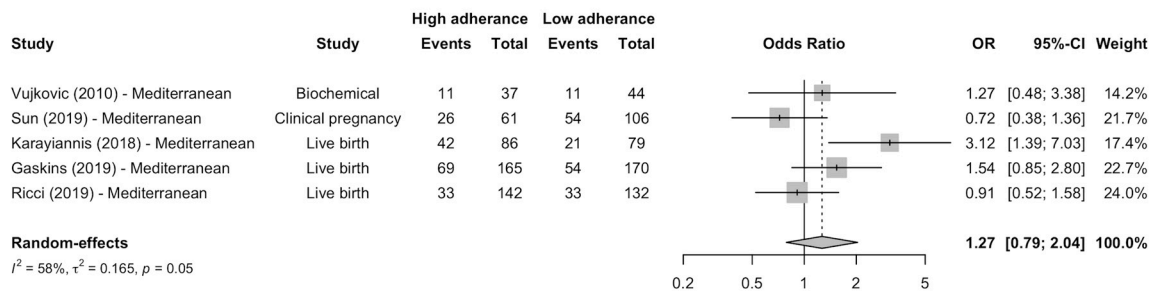

**Figure S6:** Adjusted OR of the association of Mediterranean diet to ART outcomes

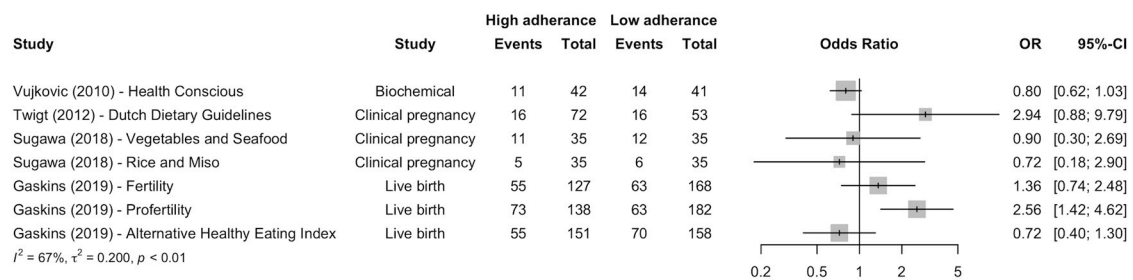

**Figure S7:** Adjusted OR of the association of Healthy diets and ART outcomes
